# Supplementary material
Source: MDPI journal article supplement (https://www.mdpi.com/2075-163X/2/4/318)
Supplement: s1 [file s1]

## Sheet: Table 1
Kimberlite	CA	CA	CA	CA	CA	CA	CA	CA	CA	CA	CA	CA	CA	CA	CA	CA	CA	CA	CA	CA
Borehole	33/35	33/35	33/35	33/35	33/35	33/35	33/35	33/35	33/35	33/35	33/35	33/35	33/35	33/35	33/35	33/35	33/35	33/35	33/35	33/35
Olivine macrocryst	1	1	1	1	1	2A	2A	2A	2B	2B	2B	3A	3A	3A	3B	3B	3B	3C	3C	3C
Point	506.3-I-Ol-2	506.3-I-Ol-5	506.3-I-Ol-6	506.3-I-Ol-7	506.3-I-Ol-8	505B_e-Ol36	505B_e-Ol41	505B_e-Ol43	505B_a-Ol1	505B_a-Ol7	505B_a-Ol10	505.6-b-ol-1	505.6-b-ol-2	505,6 C OL 34	505,6 e oli 60	505,6 e ol 61	505,6 e ol 65	505.6-b-ol-11	505,6 C OL 31	505,6 C OL 32
(wt.%)
SiO2	41.16	41.15	40.95	41.04	41.34	41.08	41.18	40.88	41.04	41.2	41.04	40.35	40.03	40.16	39.55	39.17	39.13	38.69	39.13	39.23
TiO2	0	0	0	0	0	0	0	0	0	0	0	0.04	0.02	0.01	0.02	0.03	0.05	0.04	0.03	0.07
Al2O3	0	0	0	0	0	0	0	0	0	0	0	0	0	0	0	0.02	0	0	0.02	0
Cr2O3	0	0	0	0	0	0	0	0	0	0	0	0.03	0.01	0.03	0.03	0.03	0.07	0.12	0.11	0.11
Fe2O3	0.21556	0.326281	0.606377	0.474798	0	0	0	0.371693	0.198895	0	0	—	—	—	—	—	—	—	—	—
FeO	7.44604	7.36641	7.13438	7.17277	7.66	7.94	7.91	7.63555	7.89103	8.15	8.04	—	—	—	—	—	—	—	—	—
FeOT	7.6616	7.69269	7.74075	7.64757	7.66	7.94	7.91	8.00724	8.08993	8.15	8.04	10	10	8.39	11.99	11.83	12.21	14.63	14.54	14.38
MnO	0.111	0.102	0.109	0.097	0.123	0.145	0.129	0.124	0.13	0.143	0.148	0.16	0.15	0.07	0.12	0.18	0.15	0.19	0.2	0.14
MgO	51.03	51.09	51.02	51.1	50.86	50.46	50.53	50.57	50.59	50.46	50.43	49.05	49.08	50.74	47.43	47.67	47.37	45.72	45.58	45.61
CaO	0.006	0.012	0.01	0	0.022	0.01	0	0.02	0.026	0.018	0.018	0.02	0.01	0	0.06	0.07	0.02	0.03	0.04	0.03
NiO	—	—	—	—	—	—	—	—	—	—	—	0.35	0.33	0.41	0.35	0.39	0.3	0.15	0.18	0.08
Sum Ox%	99.9686	100.047	99.8298	99.8846	100.005	99.635	99.749	99.6012	99.8759	99.971	99.676	99.99	99.62	99.82	99.55	99.39	99.28	99.58	99.83	99.63
(apfu)
Si	0.998033	0.997026	0.994459	0.995666	1.00264	1.00132	1.00249	0.996591	0.99818	1.00178	1.00026	0.992	0.988	0.983	0.987	0.98	0.981	0.978	0.985	0.988
Ti	0	0	0	0	0	0	0	0	0	0	0	0.001	0	0	0	0.001	0.001	0.001	0.001	0.001
Al total	0	0	0	0	0	0	0	0	0	0	0	0	0	0	0	0	0	0	0	0
Cr	0	0	0	0	0	0	0	0	0	0	0	0.001	0	0.001	0.001	0.001	0.001	0.002	0.002	0.002
Fe3	0.00393319	0.00594889	0.0110811	0.00866807	0	0	0	0.00681863	0.00364027	0	0	—	—	—	—	—	—	—	—	—
Fe2	0.150991	0.149262	0.144892	0.145529	0.155367	0.161852	0.161038	0.155669	0.160506	0.165726	0.163877	—	—	—	—	—	—	—	—	—
FeT	0.154924	0.155211	0.155973	0.154197	0.155367	0.161852	0.161038	0.162488	0.164146	0.165726	0.163877	0.206	0.206	0.172	0.25	0.247	0.256	0.309	0.306	0.303
Mn	0.0022797	0.00209326	0.00224205	0.00199326	0.00252676	0.00299362	0.00265994	0.00256043	0.00267812	0.00294509	0.0030553	0.003	0.003	0.002	0.003	0.004	0.003	0.004	0.004	0.003
Mg	1.84461	1.84536	1.84706	1.84814	1.8389	1.83357	1.83381	1.83784	1.83432	1.82908	1.83233	1.797	1.806	1.851	1.764	1.777	1.769	1.722	1.71	1.711
Ca	0.000155876	0.000311512	0.00026019	0	0.00057168	0.000261156	0	0.000522388	0.000677536	0.000468928	0.000470043	0	0	0	0.002	0.002	0	0.001	0.001	0.001
Ni	—	—	—	—	—	—	—	—	—	—	—	0.007	0.007	0.008	0.007	0.008	0.006	0.003	0.004	0.002
%Tephroite	0.113873	0.104507	0.111793	0.0994475	0.126505	0.14978	0.133163	0.127804	0.133784	0.147386	0.152785	0.149551	0.148883	0.0987654	0.148736	0.197239	0.147929	0.19656	0.19802	0.148736
%Forsterite	92.1397	92.1309	92.0981	92.2074	92.0663	91.7392	91.8049	91.7356	91.6325	91.5355	91.6288	89.5813	89.6278	91.4074	87.4566	87.6233	87.2288	84.6192	84.6535	84.829
%Fayalite	7.7386	7.749	7.77712	7.69318	7.77858	8.09796	8.06196	8.11055	8.19985	8.29368	8.19495	10.2692	10.2233	8.49383	12.3946	12.1795	12.6233	15.1843	15.1485	15.0223
Ca-Ol	0.00778613	0.0155525	0.0129736	0	0.0286217	0.0130664	0	0.026075	0.033846	0.0234673	0.0235052
Total	100	100	100	100	100	100	100	100	100	100	100	100	100	100	100	100	100	100	100	100
mg #	92.252	92.2417	92.2132	92.2992	92.2093	91.8888	91.9273	91.8769	91.7864	91.6921	91.7906	89.7154	89.7614	91.4978	87.5869	87.7964	87.358	84.7858	84.8214	84.9553
Texture types: (1) homogeneous; (2A) crystal with "iddingsite"_core; (2B) crystal with "iddingsite"_rim; (3A) zoned_core; (3B) zoned_middle; (3C) zoned_rim
