# Supplementary material
Source: MDPI journal article supplement (https://www.mdpi.com/2075-163X/2/4/318)
Supplement: s2 [file s2]

## Sheet: Table 2
Kimberlite	AC4	AC4	AC63	AC63	CA	CA	CA	CA	CA	CA	CA	CA	CA	CA	CU79	CU79	CU79	CU79	CU79	CU79	TZ	TZ	TZ	TZ	TZ	TZ
Borehole	4	4	6	6	335	335	335	77/35	33/35	33/35	33/35	335	335	335	MFD01	MFD01	MFD01	MFD01	MFD01	MFD01	34	34	G18	G18	G18	G18
Texture/association	5	5	3	3	1	1	2	2	3	3	4	4	5	5	4	4	2	2	3	3	2	2	4	4	5	5
Point	159A_a10_Grt	159A_b5_Grt	206B-a-Grt5	206B-a-Grt9	607B-a_grt2	607B-i_grt24	607C-C-Grt?7	398.2_b-Grt1	499,6-B-Gt-2	499,6-B-Gt-6	460_a-Grt2	551- ag-82	551- c-71	601 -3dia-m'-57	111,5_f_4	114,8REP_a5_grt	134B_b_6	134B_b_9	d4_grt_MP	77,6B_g_2	346.3-a_grt2	346.3-a_grt3	38-a-5	38-a-46	38-c-54	38-c-58
(wt.%)
SiO2	37.36	37.22	41.57	41.63	41.89	41.967	41.542	41.742	41.631	41.557	41.83	41.97	41.82	41.24	42.04	40.31	40.46	41.43	40.72	42.44	41.46	41.54	42.58	42.34	42.49	41.74
TiO2	0.09	0.02	0.094	0.079	0.075	0.117	0.083	0.138	0.277	0.248	0.14	0.18	0.78	0.34	0.64	0.72	0.18	0.15	0.13	0.55	0.22	0.23	0.82	0.84	0.11	0.14
Al2O3	21.36	22.07	20.41	20.18	23.313	23.571	21.059	20.419	20.249	20.373	21.36	20.57	21.41	21.43	21.26	19.62	22.71	22.33	21.57	21.21	22.55	22.5	21.15	21.18	23.7	23.61
Cr2O3	0.05	0.04	5.07	5.16	0.027	0.037	4.051	5.029	4.462	4.329	3.58	3.97	0.68	2.66	1.7	3.55	1.38	1.4	2.42	2.31	1.47	1.42	1.23	1.3	0.42	0.4
Fe2O3	1.92659	3.29634	0.436402	0.375104	0.451593	0	0.303454	0	0	0.0166568	0	0.93839	0.722306	2.17499	1.6764	4.49475	3.95876	1.86902	3.31414	0.648038	2.95	2.47	0.369453	0.707565	0.446808	2.11828
FeO	26.4764	25.9339	7.51732	7.62248	11.3427	11.892	8.09895	7.773	7.736	7.82901	8.25	6.73563	10.8301	6.57292	6.40156	4.98558	6.00786	8.18824	7.1179	6.20689	6.91	7.34	8.22756	7.96333	6.61796	5.17395
MnO	0.93	1.17	0.424	0.425	0.342	0.325	0.507	0.436	0.4	0.402	0.44	0.47	0.39	0.39	0.23	0.32	0.43	0.41	0.53	0.22	0.45	0.5	0.27	0.24	0.28	0.32
MgO	3.99	8.88	20.65	20.58	19.335	18.894	19.936	19.651	20.481	20.341	19.31	21.64	19.26	20.57	21.56	20.45	20.44	19.95	19.5	21.79	20.62	20.54	21.16	21.16	21.61	21.78
CaO	7.98	1.23	3.93	3.99	3.124	3.063	4.37	4.909	4.105	4.23	5.08	3.56	4.02	4.67	4.51	5.53	4.42	4.3	4.99	4.66	4.43	4.24	4.24	4.26	4.28	4.46
ZrO2	—	—	—	—	—	—	—	—	—	—	—	—	—	—	—	—	—	—	—	—	0.04	0.02	—	—	—	—
Y2O3	—	—	—	—	—	—	—	—	—	—	—	—	—	—	—	—	—	—	—	—	—	—	—	—	—	—
V2O3	—	—	—	—	—	—	—	—	—	—	—	—	—	—	—	—	—	—	—	—	—	—	—	—	—	—
Total	100.163	99.8603	100.102	100.042	99.9002	99.866	99.9504	100.097	99.341	99.3257	99.99	100.034	99.9124	100.048	100.018	99.9803	99.9866	100.027	100.292	100.035	101.11	100.79	100.047	99.9909	99.9548	99.7422
(apfu)
Si	2.94408	2.89106	2.97798	2.98625	2.99937	3.0102	2.98167	3.00002	3.00122	2.9969	3.00283	2.98988	3.0106	2.94603	2.98409	2.90482	2.88933	2.9615	2.92254	3.0041	2.929	2.943	3.02601	3.01176	2.98842	2.94392
Ti	0.00533343	0.00116824	0.00506397	0.00426156	0.00403833	0.00631093	0.00447993	0.00745848	0.015017	0.0134493	0.00755774	0.0096429	0.0422264	0.018265	0.0341625	0.0390175	0.00966638	0.00806321	0.00701645	0.0292768	0.012	0.012	0.0438228	0.0449334	0.00581792	0.00742545
Al	1.98381	2.02041	1.72322	1.70607	1.96732	1.9926	1.78142	1.72958	1.72044	1.73157	1.80717	1.72705	1.81652	1.80425	1.77856	1.66633	1.91136	1.88122	1.82456	1.76944	1.877	1.878	1.77146	1.77563	1.96453	1.96257
Cr	0.00311522	0.0024565	0.287161	0.292648	0.00152848	0.00209828	0.229885	0.285764	0.254323	0.246826	0.20319	0.223604	0.0387037	0.150237	0.0954054	0.20226	0.0779157	0.0791224	0.137323	0.129279	0.082	0.08	0.0691108	0.073112	0.023355	0.0223054
Fe3	0.114245	0.192673	0.0235254	0.0202479	0.0243318	0	0.0163898	0	0	0.000903916	0	0.0503043	0.0391288	0.116919	0.0895435	0.243736	0.212734	0.100535	0.178991	0.0345182	0.157	0.132	0.0197575	0.0378742	0.0236474	0.112425
Fe2	1.74485	1.68463	0.450361	0.45727	0.679189	0.713342	0.486135	0.467191	0.466395	0.472162	0.495282	0.401281	0.652012	0.392675	0.380006	0.300454	0.358795	0.489489	0.427229	0.367426	0.408	0.435	0.488981	0.473718	0.389255	0.305177
Mn	0.0620743	0.0769755	0.0257273	0.0258223	0.0207411	0.0197449	0.0308224	0.0265413	0.0244246	0.024555	0.0267536	0.0283595	0.0237804	0.0235977	0.0138281	0.0195318	0.0260091	0.0248237	0.0322192	0.0131901	0.027	0.03	0.0162523	0.0144599	0.0166801	0.0191166
Mg	0.468732	1.02826	2.20532	2.20077	2.06383	2.02032	2.13314	2.10544	2.20111	2.1868	2.06649	2.29816	2.06697	2.19059	2.28142	2.19689	2.17601	2.12592	2.08639	2.29935	2.171	2.169	2.24176	2.24385	2.26578	2.29003
Ca	0.673757	0.102363	0.301642	0.306656	0.239656	0.235392	0.336056	0.378008	0.317068	0.326833	0.390719	0.27172	0.310065	0.357432	0.342991	0.426962	0.338182	0.329323	0.383717	0.353414	0.335	0.322	0.322841	0.324666	0.322519	0.337028
Zr	—	—	—	—	—	—	—	—	—	—	—	—	—	—	—	—	—	—	—	—	0.001	0.001	—	—	—	—
Y	—	—	—	—	—	—	—	—	—	—	—	—	—	—	—	—	—	—	—	—	—	—	—	—	—	—
V	—	—	—	—	—	—	—	—	—	—	—	—	—	—	—	—	—	—	—	—	—	—	—	—	—	—
almandine	59.1592	58.2468	15.0974	15.2907	22.6139	23.8672	16.2797	15.6924	15.5	15.6846	16.6244	13.3782	21.3577	13.2468	12.5903	10.2062	12.3765	16.4835	14.5834	12.1127	13.879	14.709	15.9286	15.4977	13.0002	10.3403
pyrope	15.8924	35.5525	73.9283	73.5916	68.716	67.5963	71.4344	70.7193	73.1509	72.6427	69.3629	76.6176	67.7067	73.8992	75.5877	74.6267	75.0608	71.5905	71.2187	75.8016	73.805	73.387	73.0254	73.4077	75.6714	77.5925
grossular	21.5132	3.22583	8.54599	8.64683	7.86001	7.84272	9.86518	10.8563	9.11099	9.43401	11.745	7.78124	9.52699	10.411	10.1175	11.2338	10.0815	10.0837	11.1264	10.5046	0	0.564	9.78371	9.76408	10.4893	10.6482
spessartine	2.10463	2.66146	0.86245	0.863473	0.690585	0.660632	1.03218	0.891491	0.811719	0.815686	0.897997	0.945467	0.778964	0.796063	0.458149	0.663481	0.897176	0.835938	1.0998	0.434832	0.912	1.011	0.529419	0.473058	0.557073	0.647723
uvarovite	0.0337827	0.00392211	1.42412	1.48322	0.00610673	0.00825866	1.27306	1.7937	1.34682	1.34477	1.32055	1.00745	0.202987	0.866901	0.542722	1.36356	0.410966	0.424112	0.837414	0.767486	4.001	3.892	0.381696	0.402039	0.1247	0.121021
andradite	1.23892	0.307626	0.11667	0.102622	0.0972129	0	0.0907637	0	0	0.00492476	0	0.226647	0.205216	0.67465	0.509376	1.64318	1.12207	0.538887	1.09151	0.204923	7.63	6.437	0.10912	0.208268	0.126262	0.609977
Ca-Ti Gt	0.0578378	0.00186524	0.0251138	0.0215987	0.0161344	0.0248393	0.0248091	0.0468158	0.0795255	0.0732754	0.0491185	0.0434463	0.221462	0.105393	0.194336	0.263042	0.0509853	0.0432205	0.0427871	0.173807			0.242032	0.247087	0.031064	0.0402877
Total	100	100	100	100	100	100	100	100	100	100	100	100	100	100	100	100	100	100	100	100	100.227	100	100	100	100	100
Texture/association: (1) eclogite; (2) grt lherzolite; (3) phl-grt wehrlite; (4) macrocryst; (5) microcryst.
