# Supplementary material
Source: MDPI journal article supplement (https://www.mdpi.com/2075-163X/2/4/318)
Supplement: s3 [file s3]

## Sheet: Table 3
Kimberlite	AC63	AC63	AC63	AC63	CA	CA	CA	CA	CA	CA	CA	CA	CA	CA	CA	CA	CA	CA	An116	An116	CU79	CU79	CU79	CU79	CU79	CU79	CU79	CU79	CU79	CU79	CU79	CU79	CU79	CU79	CU79	CU79	TZ	TZ	TZ	TZ
Borehole	6	6	6	6	33/35	33/35	536	384	335	335	335	335	335	77-35	33/35	33/35	33/35	33/35	116	116	MFD01	MFD01	MFD01	MFD01	MFD01	MFD01	MFD01	MFD01	MFD01	MFD01	MFD01	MFD01	MFD01	MFD01	MFD01	MFD01	G10	G18	34	34
Texture/association	8	8	5	5	10	10	8	8	9	9	1	1	2	2	11	11	5	5	6	6	2	2	8	8	11	7	7	9	5	5	6	6	4	4	3	3	8	8	2	2
Point	299A-a-Cpx8	299A-a-Cpx15	206B-a-Cpx5	206B-a-Cpx8	505.6-b-14	505.6-b-15	304-j-35	384-m-40	601-a-110	601 a-113	607B_d-Cpx21	607B_j-Cpx32	C-3CPX	398.2-d-Cpx2	505B_d-Cpx1	505B_d-Cpx3	499,6-B-Cpx-4	499,6-B-Cpx-5	57,8A_c-Cpx4	57,8A_c-Cpx6	178-b13	175.5-h1	112,6B_d_6	131C_d1_px1	114,8REP_a12_Px	134B_i_2	136,8_b_3	105,5_c_6	a11_cpx_MP	63_c cpx3	111_c1	111_c8	111_a11	111_a13	172,5B_a5_px	172.5B_e_cpx 11	95 f-106	38-e-24	46.3-a_cpx3	346.3-a_cpx4
(wt.%)
SiO2	54.7	54.453	54.862	54.998	54.19	53.91	55.08	55.29	55.04	55.01	55.368	55.493	54.717	54.74	54.357	54.614	54.324	54.412	54.713	54.517	53.79	55.06	53.59	54.14	50.53	54.68	54.83	54.03	54.13	53.46	53.29	53.14	53.32	53.35	54.23	53.34	55.41	55.69	54.74	54.79
Al2O3	2.24	2.298	4.517	4.479	1.04	1.07	3.77	2.66	1.78	2.33	7.302	6.691	3.381	3.17	2.948	3.11	3.657	3.701	0.763	0.764	7.38	2.39	1.45	3.53	5.32	3.52	3.69	4.09	2.33	1.12	1.45	1.55	1.09	0.99	2.44	1.18	2.9	3.42	2.95	3.19
TiO2	0.28	0.287	0.121	0.117	0.11	0.13	0.49	0.21	0.26	0.09	0.433	0.356	0.108	0.191	0.112	0.09	0.31	0.304	0.074	0.068	0.35	0.15	0.79	0.39	0.72	0.39	0.32	0.51	0.12	1.17	1.51	1.3	0.47	0.34	0.21	0.24	0.2	0.26	0.18	0.23
FeO	0.714256	0.47896	0	0	0.315514	0	3.81907	2.16509	1.91509	1.46099	0.826206	1.26532	0.636396	0.200188	0.128737	0.418287	0.0852234	0.452869	0	0	1.69745	2.80781	3.28235	2.88068	2.76387	2.88002	2.9955	2.64308	0.999843	2.27694	4.09124	3.46349	4.20142	5.24427	2.89944	1.3708	1.34721	2.23776	0	0
Fe2O3	2.4847	2.87733	2.81573	2.39686	0	0	1.93479	0.272179	1.76139	1.3103	2.54921	2.15345	1.92775	2.36475	2.44304	2.07235	2.80925	2.48624	2.69367	3.6816	1.54761	0.591445	2.68686	2.81096	4.74116	2.66722	2.60556	3.56402	1.745	2.82623	1.5434	2.6967	2.4434	1.91789	2.30112	3.26648	1.08111	0.513706	4.92357	4.42064
Cr2O3	2.84	2.975	4.554	4.457	1.99	2.02	0.28	2.9	1.83	2.24	0.087	0.116	3.039	2.886	2.901	2.832	3.507	3.868	3.267	3.106	0.13	1.33	0.45	0.5	1.05	0.47	0.57	0.06	1.48	0.45	0.19	0.19	0.07	0.03	0.59	0.51	1.39	1.8	0.83	0.85
MgO	15.16	15.049	13.172	13.234	16.12	16.81	16.16	14.73	15.06	15.1	12.78	13.071	14.935	15.39	14.968	15.026	15.077	14.688	15.48	15.688	13.5	18.28	18.31	17.85	17.56	17.74	18.22	15.36	16.38	17.82	16.63	17.71	16.2	16.96	15.59	16.19	15.23	14.36	16.04	15.64
MnO	0.09	0.085	0.07	0.099	0.05	0.07	0.18	0.13	0.07	0.12	0.047	0.052	0.068	0.077	0.074	0.069	0.102	0.093	0.068	0.055	0.06	0.03	0.2	0.14	0.39	0.12	0.17	0.14	0.08	0.17	0.14	0.12	0.16	0.13	0.1	0.06	0	0.09	0	0
CaO	19.02	18.759	14.946	14.914	22.03	21.99	15.72	18.69	19.88	19.75	15.791	16.271	18.1	17.741	18.847	18.866	16.128	15.949	20.515	20.651	17.88	17.62	18.43	15.55	15.84	15.21	14.31	16.31	20.83	19.74	19.83	18.98	21.47	20.5	19.67	22.58	19.77	18.43	20.58	20.02
Na2O	2.89	2.991	4.913	4.855	1.58	1.61	2.88	2.97	2.52	2.6	4.887	4.564	3.222	3.267	3.021	3.002	3.755	3.889	2.45	2.469	3.41	1.7	1.09	2.22	1.23	2.5	2.56	3.02	1.69	1.18	1.25	1.13	0.74	0.48	1.95	1.03	2.7	3.29	2.68	2.89
K2O	0.02	0.025	0.018	0.021	0.08	0.11	0	0.01	0.02	0	0.016	0.016	0.022	0.012	0.019	0.007	0.032	0.046	0.019	0.024	0.03	0.03	0	0.01	0.2	0.01	0	0	0.01	0	0	0	0	0	0	0	0.03	0.01	0.02	0
Sum Ox%	100.19	100.119	100.023	99.931	99.72	100.5	100.13	99.98	99.97	99.87	99.959	99.954	100.022	99.913	99.695	100.005	99.58	99.727	99.929	99.981	99.62	99.92	100.01	99.99	100.05	99.92	100.03	99.37	100.01	99.98	99.99	100	100.05	99.98	99.75	99.59	99.96	100.04	100.72	100.51
(apfu)
Si	1.9721	1.96701	1.9699	1.97589	2.00371	2.00387	1.97714	1.9968	1.99366	1.9892	1.9689	1.97747	1.96895	1.9688	1.96576	1.96811	1.9578	1.96126	1.98465	1.97444	1.93104	1.97836	1.94269	1.94712	1.8346	1.95961	1.95929	1.95545	1.96158	1.94056	1.94757	1.93146	1.95506	1.95933	1.97076	1.95213	1.99356	2.00288	1.94861	1.95537
Al	0.0951802	0.0978344	0.191152	0.18965	0.0453218	0.0468749	0.159493	0.113221	0.0759889	0.0992999	0.30603	0.281009	0.143389	0.134373	0.125649	0.132088	0.155331	0.157223	0.0326194	0.0326109	0.31225	0.10121	0.0619504	0.149626	0.227646	0.148676	0.155405	0.174459	0.0995131	0.0479151	0.0624558	0.0663976	0.0471036	0.0428514	0.104506	0.0508972	0.122969	0.144964	0.123765	0.134176
Ti	0.00759455	0.00779954	0.00326859	0.0031623	0.00305993	0.00363534	0.0132325	0.0057057	0.00708515	0.00244839	0.0115839	0.00954388	0.00292374	0.00516811	0.00304716	0.00244	0.00840505	0.0082436	0.00201943	0.00185278	0.00945277	0.00405473	0.0215451	0.0105522	0.0196664	0.010515	0.00860268	0.0138862	0.00327153	0.0319511	0.0415171	0.0355476	0.0129649	0.00939409	0.00574138	0.00660798	0.00541344	0.00703482	0.00482053	0.0061753
Fe2+	0.0215362	0.0144696	0	0	0.00975682	0	0.11465	0.0653938	0.0580144	0.0441831	0.0245712	0.037709	0.019152	0.00602152	0.0038936	0.0126064	0.00256867	0.0136517	0	0	0.0509635	0.0843742	0.0995125	0.0866447	0.0839233	0.0863195	0.0895209	0.0800009	0.0303021	0.069123	0.125048	0.105281	0.128837	0.161076	0.0881215	0.041957	0.0405368	0.0673077	0	0
Fe3+	0.067412	0.0782162	0.0760826	0.0648006	0	0	0.0522634	0.00739714	0.048012	0.0356556	0.0682171	0.0577469	0.0522019	0.0640033	0.0664857	0.0561992	0.0761883	0.0674381	0.0735293	0.100339	0.0418092	0.0159921	0.0732969	0.0760767	0.129538	0.0719319	0.0700654	0.0970675	0.0475865	0.0772018	0.042447	0.0737597	0.0674197	0.0530053	0.0629298	0.0899615	0.0292706	0.0139032	0.131893	0.118723
Cr	0.0809541	0.084967	0.129284	0.126601	0.0581766	0.0593649	0.00794656	0.0828063	0.0524086	0.0640417	0.00244604	0.0032682	0.0864614	0.0820674	0.0829472	0.0806895	0.0999287	0.110231	0.0936961	0.0889391	0.00368987	0.0377832	0.0128976	0.0142175	0.0301411	0.0133173	0.016104	0.00171689	0.0424041	0.0129148	0.0054901	0.00546004	0.0020293	0.00087111	0.0169522	0.0147572	0.0395398	0.0511833	0.0233602	0.0239842
Mg	0.814802	0.810407	0.705075	0.708789	0.888572	0.93149	0.864759	0.79305	0.813222	0.813999	0.677497	0.694372	0.801178	0.825174	0.806957	0.807234	0.810032	0.789249	0.837097	0.847015	0.722493	0.979164	0.989506	0.957025	0.950444	0.947774	0.9706	0.828732	0.884896	0.964308	0.906048	0.959607	0.885516	0.92856	0.844601	0.883309	0.816867	0.769914	0.851207	0.8321
Mn	0.00274837	0.00260072	0.00212893	0.00301259	0.00156595	0.00220388	0.00547275	0.00397668	0.00214764	0.00367543	0.00141564	0.00156952	0.00207259	0.00234573	0.00226672	0.00210613	0.00311363	0.00283932	0.00208926	0.0016872	0.00182444	0.000913019	0.00614101	0.00426474	0.0119935	0.00364261	0.00514542	0.00429171	0.00245555	0.00522681	0.00433378	0.00369433	0.00496914	0.00404396	0.00307812	0.00185993	0	0.00274164	0	0
Ca	0.734733	0.726059	0.57501	0.574098	0.872787	0.875795	0.604606	0.723225	0.771555	0.76521	0.601662	0.621247	0.697861	0.683678	0.730289	0.728454	0.622779	0.615958	0.797339	0.801366	0.687755	0.678346	0.71585	0.599214	0.616202	0.584046	0.547896	0.632475	0.808787	0.767754	0.776512	0.739159	0.84349	0.806686	0.765908	0.885434	0.762122	0.710198	0.784951	0.765542
Na	0.202018	0.209485	0.342035	0.338186	0.113273	0.116032	0.200441	0.207967	0.17698	0.182289	0.336945	0.315333	0.224797	0.227822	0.211825	0.209753	0.262384	0.271788	0.17231	0.173375	0.237353	0.118432	0.0766121	0.154803	0.086586	0.173713	0.177367	0.211919	0.118742	0.0830483	0.0885747	0.0796332	0.0526082	0.0341795	0.137398	0.0730876	0.188346	0.229416	0.184972	0.199976
K	0.000919891	0.0011521	0.000824537	0.000962496	0.00377373	0.00521623	0	0.000460735	0.000924204	0	0.000725856	0.000727373	0.00100995	0.000550607	0.000876584	0.000321816	0.00147126	0.00211526	0.000879249	0.00110889	0.00137396	0.00137516	0	0.000458816	0.00926372	0.000457199	0	0	0.000462309	0	0	0	0	0	0	0	0.00137698	0.000458819	0.000908269	0
Sum cat	4	4	4	4	4.06848	4.13028	4	4	4	4	4	4	4	4	4	4	4	4	4	4	4	4	4	4	4	4	4	4	4	4	4	4	4	4	4	4	4	4	4	4
Wo	46.7664	46.8142	44.9196	44.7505	49.2789	48.4591	38.1692	45.7254	46.9661	47.1365	46.1493	45.9051	45.9666	45.131	47.3863	47.0488	43.3878	43.4122	48.7837	48.6153	47.0675	38.9432	39.6622	36.4733	37.3327	36.0937	34.0728	41.0376	46.9138	42.6249	42.958	40.9722	45.4016	42.5395	45.0897	48.9001	47.0583	45.8956	47.9753	47.917
En	51.8628	52.2528	55.0804	55.2495	50.1702	51.5409	54.5928	50.1401	49.5024	50.1419	51.966	51.3085	52.7719	54.4715	52.361	52.137	56.4333	55.6256	51.2163	51.3847	49.4448	56.2129	54.8243	58.2528	57.5828	58.5718	60.3601	53.7716	51.3285	53.5374	50.1241	53.1919	47.6637	48.9664	49.7225	48.7827	50.4387	49.7547	52.0247	52.083
Fs	1.3708	0.932961	0	0	0.550886	0	7.23793	4.13448	3.53146	2.72165	1.88469	2.78639	1.2615	0.397493	0.252644	0.814215	0.178954	0.962159	0	0	3.48776	4.84385	5.51356	5.27394	5.0845	5.33449	5.56716	5.19079	1.75768	3.83764	6.91787	5.83584	6.93475	8.49414	5.18779	2.31717	2.50301	4.34967	0	0
Total	100	100	100	100	100	100	100	100	100	100	100	100	100	100	100	100	100	100	100	100	100	100	100	100	100	100	100	100	100	100	100	100	100	100	100	100	100	100	100	100
Q	90.6215	89.8059	82.7292	83.4486	97.5049	97.4719	88.2081	92.9144	92.9816	92.3249	77.6965	79.9799	88.5872	88.421	88.9149	89.1576	86.1108	86.3305	93.9015	92.5365	80.4955	93.6957	93.0289	87.9212	82.2098	88.0023	87.7027	85.0212	92.1383	93.5048	94.5149	92.791	94.1936	95.1883	91.0273	92.7822	91.4075	90.6893	86.4861	86.3338
Jd	5.49012	5.66504	12.3538	12.3363	2.49509	2.52809	8.88158	6.65109	4.30095	5.64734	18.238	16.6073	8.3668	7.84317	7.24924	7.60619	9.31856	9.56624	1.87405	1.8307	17.2013	5.44407	3.19313	8.00742	11.3383	8.08571	8.47591	9.62406	5.31847	2.48741	3.26565	3.41516	2.38818	2.15098	5.60034	2.60803	6.94048	8.49587	6.54214	7.25064
Ae	3.88841	4.52906	4.91706	4.21512	0	0	2.91036	0.434541	2.71747	2.02779	4.06544	3.41277	3.04601	3.73579	3.83585	3.2362	4.57066	4.10327	4.2244	5.63283	2.3032	0.860211	3.77797	4.07135	6.4519	3.91201	3.82143	5.35476	2.54326	4.00777	2.21944	3.79383	3.41822	2.66067	3.37233	4.60972	1.65206	0.81482	6.97177	6.41559
Total	100	100	100	100	100	100	100	100	100	100	100	100	100	100	100	100	100	100	100	100	100	100	100	100	100	100	100	100	100	100	100	100	100	100	100	100	100	100	100	100
Texture/association: (1) eclogite; (2) grt lherzolite; (3) lherzolite; (4) pyroxenite; (5) phl-grt wehrlite; (6) phl-rich suite; (7) megacryst; (8) macrocryst; (9) microcryst ; (10) as inclusion in chr; (11) as inclusion in grt.
