# Supplementary material
Source: MDPI journal article supplement (https://www.mdpi.com/2075-163X/2/4/318)
Supplement: s4 [file s4]

## Sheet: Table 4a
Kimberlite	CA	CA	CA	CA	CA	CA	CA	CA	CA	CA	CA	CA	CA	CA	CA	CA	CA	CA	CA	CA	CA	CA	CA
Borehole	335	335	335	33/35	33/35	33/35	33/35	33/35	33/35	33/35	33/35	33/35	335	335	335	33/35	33/35	33/35	33/35	33/35	335	536	335
Texture/association	1	1	1	2	2	2	3	3	3	4	4	4	1	1	1	2	2	3	3	3	4	4	4
Mineral	grt	grt	grt	grt	grt	grt	grt	grt	grt	grt	grt	grt	cpx	cpx	cpx	cpx	cpx	cpx	cpx	cpx	cpx	cpx	cpx
Spot name	au18a08	au18a12	au18a13	se15a09	se15a10	se15a13	au19c05	au19c06	au19c08	au19a13	se15a07	se15c03	au18a05	au18a09	au18a11	au19c12	au19c13	au19c09	au19c10	au19c11	fe25a15	fe26a09	fe26c13
All values are reported in ppm
Sc	61.99	60.62	63.79	100.11	101.34	96.21	189.59	190.47	175.25	168.69	190.65	47.07	20.79	9.26	20.66	30.17	30.12	51.69	52.82	53.77	—	—	—
Ni	27.52	29.63	32.26	92.51	97.36	88.6	49.09	119	46.65	18.1	22.05	4.86	261.29	140.08	330.14	432.41	444.42	307.64	315.6	305.74	330.37	240.67	379.41
Ga	9.88	10.73	11.92	10.44	10.49	9.7	4.28	6.7	4.07	5.34	4.14	9.64	15.64	6.95	16.41	6.85	7.09	3.85	4.05	4.06	8.04	7.64	9.1
Y	17.3	18.35	17.12	21.18	21.55	19.14	41.23	37.94	34.75	15.88	17.13	24.27	3.71	1.331	2.239	4.41	4.48	6.35	7.03	7.27	3.91	4.61	4.54
Zr	15.57	17.61	17.6	51.78	50.8	48.06	87.52	82.3	81.34	69.88	77.45	12.88	92.12	21.01	50.96	20.1	20.88	83.67	84.81	85.89	55.24	19.59	57.45
La	0.0109	<0.015	0.0303	1.316	1.102	0.0571	1.898	0.839	0.179	4.22	0.596	0.003	21.45	5.69	14.61	3.52	4.82	3.07	3.13	4.25	3.15	2.079	19.02
Ce	0.173	0.22	0.195	2.648	2.302	0.319	3.59	1.755	0.553	7.93	1.619	0.0564	63.61	14.34	39.56	9.26	11.34	11.16	11.74	13.85	11.98	7.66	45.88
Pr	0.0675	0.078	0.0509	0.305	0.307	0.1025	0.455	0.212	0.113	1.127	0.332	0.0268	9.86	2.093	5.68	1.544	1.761	2.185	2.128	2.444	2.115	1.29	6.04
Nd	0.807	0.92	0.78	1.79	2	1.03	2.64	1.36	1.38	6.73	3.3	0.543	41	8.68	22.92	8.67	9.12	13.2	11.98	14.49	10.74	7.05	28.04
Sm	0.677	0.555	0.404	1.034	1.084	0.939	1.5	1.36	1.54	3.61	3.08	0.913	6.19	1.215	3.06	2.238	2.326	3.33	3.51	3.45	2.69	1.889	4.78
Eu	0.313	0.352	0.285	0.515	0.525	0.578	0.858	0.7	0.764	1.469	1.608	0.509	1.531	0.275	0.688	0.666	0.706	1.17	1.029	1.159	0.959	0.636	1.379
Gd	1.277	1.31	1.08	2.002	1.88	1.88	3.57	3.34	2.97	4.21	5.23	2.156	3.45	0.632	1.687	1.804	1.916	2.99	2.82	3.13	1.87	1.692	2.97
Tb	0.27	0.255	0.288	0.48	0.468	0.467	0.854	0.728	0.706	0.562	0.857	0.496	0.301	0.0596	0.152	0.238	0.245	0.404	0.418	0.418	0.246	0.236	0.312
Dy	2.58	2.54	2.52	3.68	3.66	3.34	6.74	6.14	5.64	3.47	4.53	3.87	1.307	0.327	0.719	1.256	1.288	2.02	1.98	2.06	1.183	1.205	1.459
Ho	0.645	0.666	0.645	0.829	0.853	0.763	1.557	1.397	1.326	0.616	0.678	0.926	0.163	0.049	0.0964	0.182	0.1804	0.289	0.318	0.31	0.178	0.224	0.201
Er	2.16	2.22	2.05	2.47	2.45	2.41	5.15	4.62	4.46	1.6	1.461	2.98	0.256	0.1089	0.18	0.394	0.4	0.649	0.602	0.587	0.348	0.414	0.317
Tm	0.34	0.296	0.319	0.382	0.336	0.311	0.752	0.735	0.641	0.218	0.183	0.456	0.0217	0.0106	0.0129	0.0445	0.0485	0.061	0.0689	0.0501	0.038	0.0515	0.0422
Yb	2.44	2.3	2.74	2.6	2.66	2.34	6.26	5.92	5.51	1.51	1.263	3.57	0.098	0.0566	0.078	0.193	0.19	0.326	0.359	0.439	0.172	0.308	0.261
Lu	0.388	0.386	0.4	0.34	0.35	0.366	1.077	0.897	0.883	0.24	0.197	0.496	0.0092	0.00715	0.0068	0.0248	0.0223	0.0322	0.0448	0.0486	0.0191	0.0379	0.0235
Texture/association: (1) eclogite; (2) grt lherzolite; (3) phl-grt wehrlite; (4) macrocryst. (<) below the detection limit; (—) not detected

## Sheet: Table 4b
Kimberlite	CU79	CU79	CU79	CU79	CU79	CU79	CU79	CU79	CU79	CU79	CU79	CU79	CU79	CU79	CU79	TZ	TZ	TZ	TZ	TZ	TZ
Borehole	MFD01	MFD01	MFD01	MFD01	MFD01	MFD01	MFD01	MFD01	MFD01	MFD01	MFD01	MFD01	MFD01	MFD01	MFD01	G18	34	34	G10	G10	G10
Texture/association	2	2	2	3	3	3	5	5	5	2	2	2	4	4	4	5	5	5	5	5	5
Mineral	grt	grt	grt	grt	grt	grt	grt	grt	grt	cpx	cpx	cpx	cpx	cpx	cpx	grt	grt	grt	cpx	cpx	cpx
Spot name	au18b07	au18b08	au18b13	se15c03	se15c05	se15c06	au19b11	au19b13	au19b14	au18b09	au18b14	au18b15	au19b05	au19b06	au19b16	fe27b07	fe27c09	fe27c14	fe27a08	fe27a09	fe27a16
All values are reported in ppm
Sc	79.88	74.34	76.87	47.07	49.71	101.52	79.32	76.64	78.36	32.73	32.49	34.16	45.5	57.98	54.06	—	—	—	—	—	—
Ni	20.75	20.8	20.53	4.86	88.17	33.7	112.79	109.45	111.5	265.48	270.76	260.12	122.57	178.7	209.99	122.95	108.42	126.62	241.21	242.99	250.81
Ga	7.82	7.75	8.41	9.64	10.09	6.63	11.96	11.88	12.87	7.23	7.27	7.92	8.6	10.66	11.54	15.45	19.4	13.59	6.1	6.19	5.46
Y	23.98	22.51	21.73	24.27	25.08	30.47	21.61	21.38	22.06	3.75	3.89	4.26	6.75	6.93	6.41	18.48	17.72	18.69	3.52	3.85	2.42
Zr	15.35	19.58	17.8	12.88	13.21	66.49	39.98	39.55	41.2	34.55	34.35	39.24	64.08	93.5	88.53	54.62	43.1	54.05	65.68	69.36	30.44
La	<0.0069	<0.0042	0.0044	0.003	0.1214	0.0224	0.0338	0.0312	0.025	6.89	6.87	6.73	5.41	5.69	5.19	0.0474	1.16	0.107	21.82	20.85	11.37
Ce	0.0482	0.0261	0.0176	0.0564	0.275	0.286	0.226	0.257	0.232	14.11	14.38	13.99	15.62	18.15	20.03	0.392	2.94	0.472	66.16	61.78	25.99
Pr	0.0192	0.0138	0.0127	0.0268	0.0708	0.122	0.0863	0.0899	0.097	2.208	2.211	2.187	2.493	3.07	3.13	0.1193	0.334	0.1209	8.65	8.27	3.14
Nd	0.336	0.161	0.213	0.543	0.774	1.64	0.8	0.92	0.714	10.82	10.74	10.46	13.15	16.1	15.68	1.379	1.77	1.152	36.97	36.12	11.87
Sm	0.492	0.424	0.425	0.913	0.962	1.38	0.675	0.791	0.724	2.69	2.49	2.73	3.28	4.09	3.72	0.918	0.745	0.92	6.04	6.37	2.13
Eu	0.288	0.301	0.28	0.509	0.537	0.828	0.454	0.445	0.431	0.788	0.727	0.781	1.041	1.262	1.281	0.518	0.45	0.508	1.729	1.705	0.61
Gd	1.661	1.492	1.55	2.156	2.24	3.12	1.72	1.7	1.72	2.16	2.225	2.39	2.94	3.22	2.79	1.89	1.414	1.91	3.38	3.45	1.82
Tb	0.393	0.401	0.354	0.496	0.538	0.768	0.433	0.409	0.414	0.257	0.24	0.255	0.384	0.415	0.367	0.437	0.369	0.43	0.365	0.354	0.205
Dy	3.66	3.72	3.24	3.87	4.03	5.74	3.64	3.57	3.45	1.138	1.237	1.256	1.757	2.12	1.76	2.96	2.83	3.24	1.335	1.52	0.788
Ho	0.902	0.781	0.775	0.926	1.012	1.267	0.844	0.814	0.9	0.152	0.1775	0.1734	0.276	0.302	0.299	0.737	0.712	0.774	0.192	0.176	0.133
Er	2.97	2.93	2.5	2.98	3.11	3.45	2.67	2.83	2.95	0.3	0.347	0.369	0.609	0.651	0.604	2.13	2.25	2.02	0.337	0.27	0.181
Tm	0.434	0.385	0.368	0.456	0.486	0.416	0.394	0.426	0.369	0.0259	0.0262	0.0308	0.0613	0.0649	0.0587	0.313	0.314	0.312	0.0341	0.032	0.0271
Yb	3.4	3.39	2.83	3.57	3.67	3.06	2.95	3.09	3.14	0.098	0.139	0.164	0.346	0.349	0.437	2.47	3.01	2.39	0.172	0.133	0.125
Lu	0.505	0.481	0.406	0.496	0.544	0.399	0.441	0.474	0.475	0.007	0.0139	0.0171	0.0497	0.0512	0.0353	0.342	0.382	0.384	0.0206	0.0156	0.02
Texture/association: (1) eclogite; (2) grt lherzolite; (3) phl-grt wehrlite; (4) lherzolite; (5) macrocryst. (<) below the detection limit; (—) not detected
