# Supplementary material
Source: MDPI journal article supplement (https://www.mdpi.com/2075-163X/2/4/318)
Supplement: s5 [file s5]

## Sheet: Table 5
No.	Age	Sm	Nd	Sm/Nd	147Sm/144Nd	143Nd/144Nd	elt	fSm/Nd	143Nd/144Nd	143Nd/144Nd	eNd	eNd	TDM	TCHUR
	(Ma)	(ppm)	(ppm)		actual	actual			CHUR	initial	actual	initial	Ga	Ga
1	1250	2.06	8.18	0.251834	0.1516	0.512532	0.0082085	-0.23	0.511023	0.511288	-2.1	5.2	1.25	0.36
2	1250	2.66	15.5	0.171613	0.1033	0.512529	0.0082085	-0.47	0.511023	0.511681	-2.1	12.9	0.72	0.18
4	1250	19.9	227	0.0876652	0.0528	0.511756	0.0082085	-0.73	0.511023	0.511323	-17.2	5.9	1.22	0.93
5	650	1.04	6.8	0.152047	0.0915	0.512781	0.00426004	-0.53	0.5118	0.512391	2.8	11.5	0.35	-0.21
7	650	1.19	7.8	0.152174	0.0916	0.512744	0.00426004	-0.53	0.5118	0.512354	2.1	10.8	0.39	-0.15
8	650	1.86	9.6	0.19375	0.1166	0.512771	0.00426004	-0.41	0.5118	0.512274	2.6	9.3	0.45	-0.25
9	650	0.85	5.3	0.160377	0.0965	0.512725	0.00426004	-0.51	0.5118	0.512314	1.7	10	0.43	-0.13
10	650	6.1	42.3	0.144208	0.0868	0.512747	0.00426004	-0.56	0.5118	0.512377	2.1	11.3	0.38	-0.15
